# Supplementary material
Source: publisher figshare collection journal article supplement (https://diabetesjournals.figshare.com/ndownloader/files/39862909)
Supplement: Supplementary file 1 [file 39862909]

**Differential associations of glutamic acid decarboxylase antibodies (GADA) and C-peptide with insulin initiation, glycemic responses and severe hypoglycemia in patients diagnosed with type 2 diabetes**

Baoqi Fan<sup>1</sup>, Cadmon K.P. Lim<sup>1,2</sup>, Emily W.M. Poon<sup>1</sup>, Eric S.H. Lau<sup>1</sup>, Hongjiang Wu<sup>1</sup>, Aimin Yang<sup>1</sup>, Mai Shi<sup>1</sup>, Claudia H.T. Tam<sup>1,2</sup>, Samuel Y.S. Wong<sup>3</sup>, Eric Kam-Pui Lee<sup>3</sup>, Maggie H.T. Wang<sup>3</sup>, Natural H.S. Chu<sup>1</sup>, Risa Ozaki<sup>1</sup>, Alice P.S. Kong<sup>1,2,4</sup>, Elaine Chow<sup>1,2,4</sup>, Ronald C.W. Ma<sup>1,2,4</sup>, Andrea O.Y. Luk<sup>1,2,4</sup>, Juliana C.N. Chan<sup>1,2,4</sup>

**Affiliation**

<sup>1</sup>Department of Medicine and Therapeutics, <sup>2</sup>Li Ka Shing Institute of Health Sciences, <sup>3</sup>Jockey Club School of Public Health and Family Medicine, <sup>4</sup>Hong Kong Institute of Diabetes and Obesity, The Chinese University of Hong Kong, Prince of Wales Hospital, Shatin, Hong Kong

## Table of contents

|                |                                                                                                                                                                                                                                                                                  |    |
|----------------|----------------------------------------------------------------------------------------------------------------------------------------------------------------------------------------------------------------------------------------------------------------------------------|----|
| <b>Methods</b> | Supplementary methods                                                                                                                                                                                                                                                            | 3  |
| <b>Figures</b> |                                                                                                                                                                                                                                                                                  |    |
| Figure S1      | Flow chart of participants selection                                                                                                                                                                                                                                             | 4  |
| Figure S2      | Distribution of GADA positivity and C-peptide levels (<200 pmol/L as insulin insufficient) stratified by age of diagnosis of diabetes (<40 years defined as young-onset diabetes, YOD)                                                                                           | 5  |
| Figure S3      | Correlation plot of C-peptide and diabetes duration                                                                                                                                                                                                                              | 6  |
| Figure S4      | Subgroup analysis of the associations between GADA positivity and incident insulin therapy                                                                                                                                                                                       | 7  |
| Figure S5      | Subgroup analysis of the associations between C-peptide levels stratified by 200 pmol/L and incident insulin therapy                                                                                                                                                             | 8  |
| Figure S6      | Subgroup analysis of the associations between GADA positivity and severe hypoglycemia                                                                                                                                                                                            | 9  |
| Figure S7      | Subgroup analysis of the associations between C-peptide levels stratified by 200 pmol/L and severe hypoglycemia                                                                                                                                                                  | 10 |
| Figure S8      | Mean HbA1c changes from baseline to 6 and 12 months after insulin initiation                                                                                                                                                                                                     | 11 |
| Figure S9      | Subgroup analysis of the associations between C-peptide levels stratified by 250 pmol/L and incident insulin therapy                                                                                                                                                             | 12 |
| Figure S10     | Subgroup analysis of the associations between anti-GAD positivity, C-peptide levels stratified by 250 pmol/L and severe hypoglycemia                                                                                                                                             | 13 |
| Figure S11     | Mean HbA1c changes from baseline to 6 and 12 months after insulin initiation in patients without advanced CKD at baseline                                                                                                                                                        | 14 |
| Figure S12     | Mean HbA1c changes from the date of initiation to 6 and 12 months after insulin initiation in patients initiated with basal insulin only regimen                                                                                                                                 | 15 |
| <b>Tables</b>  |                                                                                                                                                                                                                                                                                  |    |
| Table S1       | Baseline characteristics of patients with and without CP or GADA measurements                                                                                                                                                                                                    | 16 |
| Table S2       | Baseline characteristics of patients stratified by GADA status                                                                                                                                                                                                                   | 17 |
| Table S3       | Baseline characteristics of patients stratified by C-peptide of 200 pmol/L                                                                                                                                                                                                       | 18 |
| Table S4       | Baseline characteristics of patients stratified by C-peptide of 250 pmol/L                                                                                                                                                                                                       | 19 |
| Table S5       | Baseline characteristics of patients stratified by C-peptide level of 250 pmol/L and GADA positivity                                                                                                                                                                             | 20 |
| Table S6       | Associations with incident insulin use and severe hypoglycemia in patients diagnosed with type 2 diabetes stratified by C-peptide level of 250 pmol/L and GADA status.                                                                                                           | 22 |
| Table S7       | Associations with insulin initiation and severe hypoglycemia in patients diagnosed with type 2 diabetes without advanced CKD at baseline stratified by C-peptide level of 200 pmol/L and GADA status                                                                             | 23 |
| Table S8       | Associations with insulin initiation and severe hypoglycemia in patients stratified by CP and GADA status in patients diagnosed with type 2 diabetes with available CP and GADA results after excluding patients with low fasting plasma glucose and/or hypoglycemia at baseline | 24 |
| Table S9       | Associations with insulin initiation and insulin requirement in patients stratified by CP and GADA status in patients diagnosed with type 2 diabetes with available data                                                                                                         | 25 |
| Table S10      | Associations with severe hypoglycemia with adjustment for baseline insulin use with regimens in patients diagnosed with type 2 diabetes stratified by CP and GADA                                                                                                                | 26 |
| Table S11      | Subgroup analysis of associations of GADA positivity and C-peptide levels with insulin initiation and severe hypoglycemia stratified by the median of glucose:CP ratio                                                                                                           | 27 |

## **Supplementary methods**

### **Statistical analyses**

We examined the independent associations of CP and GADA and their interactions with 1) insulin initiation, 2) glycemic responses and 3) severe hypoglycemia adjusted for covariables based on prior knowledge. Among insulin-naïve patients, we performed Cox regression for insulin initiation without adjustment (model 1) followed by addition of age, sex, diabetes duration, year of assessment (model 2), HbA1c, BMI, Ln(TG:HDL-C) ratio, eGFR and baseline treatment of OGLDs (model 3). In a subset of new insulin users with HbA1c measured at month 0, 6 and 12, we compared HbA1c reduction adjusted for baseline HbA1c (model 1), followed by addition of age, sex, diabetes duration, year of assessment (model 2). For severe hypoglycemia, we performed Cox regression without adjustment (model 1) followed by addition of age, sex, diabetes duration, year of assessment (model 2), HbA1c, BMI, Ln(TG:HDL-C) ratio (model 3), eGFR, CVD history, treatment of OGLDs and insulin at baseline (model 4).

Figure S1. Flow chart of participants selection

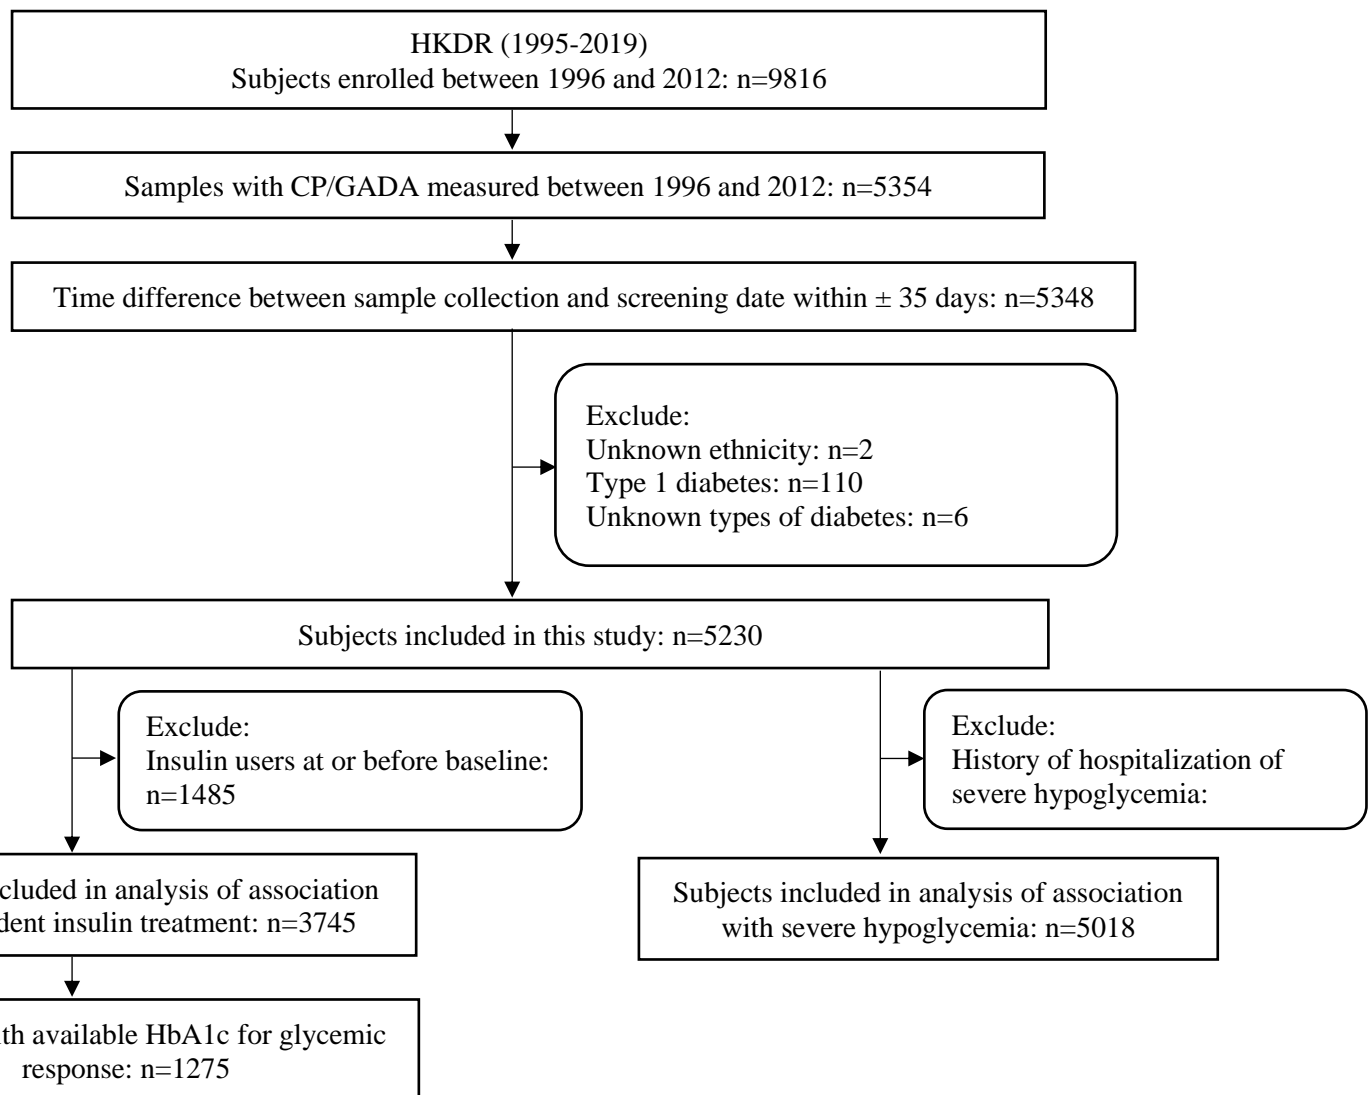

Figure S2. Distribution of GADA positivity and C-peptide levels (<200 pmol/L as insulin insufficient) stratified by age of diagnosis of diabetes (<40 years defined as young-onset diabetes, YOD)

A.

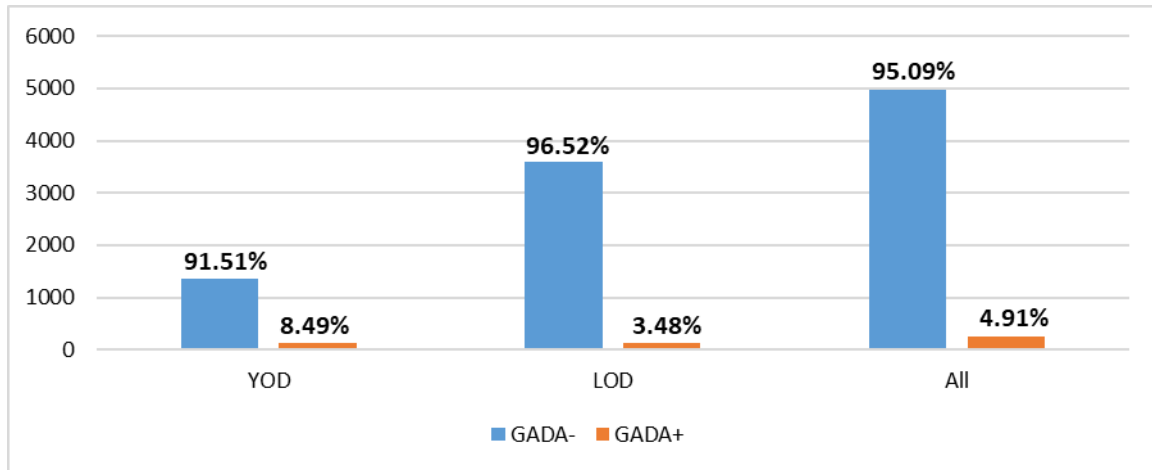

B.

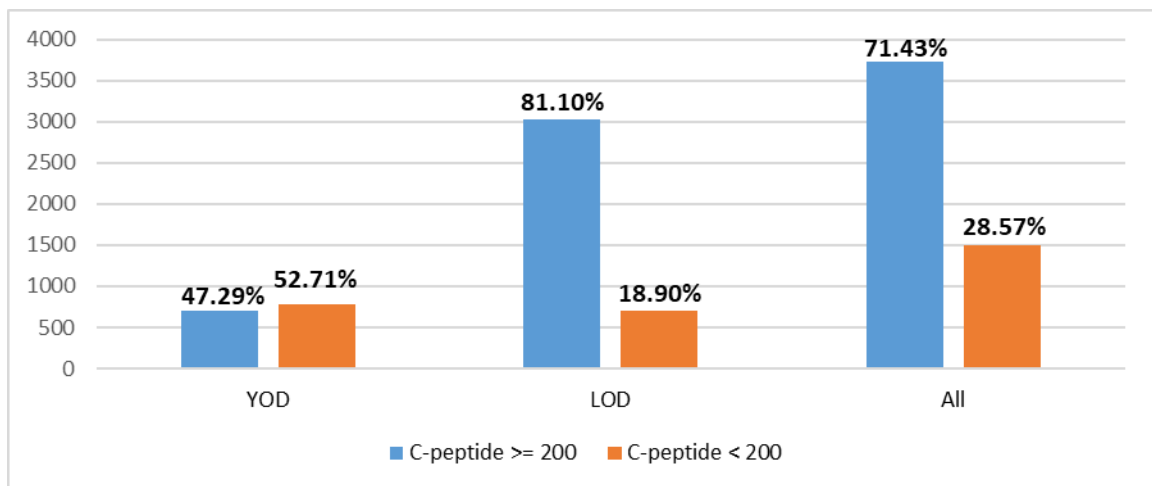

Notes: (1) Abbreviations: YOD, young-onset diabetes; LOD, late-onset diabetes.

Figure S3. Correlation plot of C-peptide and diabetes duration

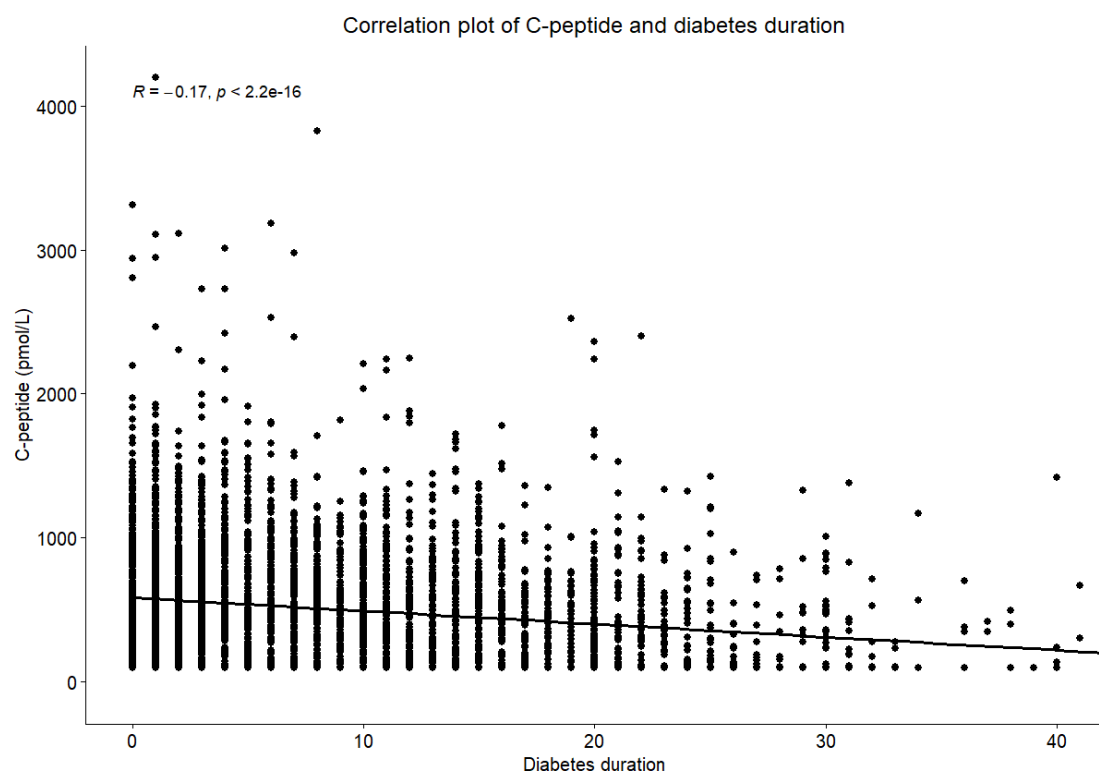

Figure S4. Subgroup analysis of the associations between GADA positivity and incident insulin therapy

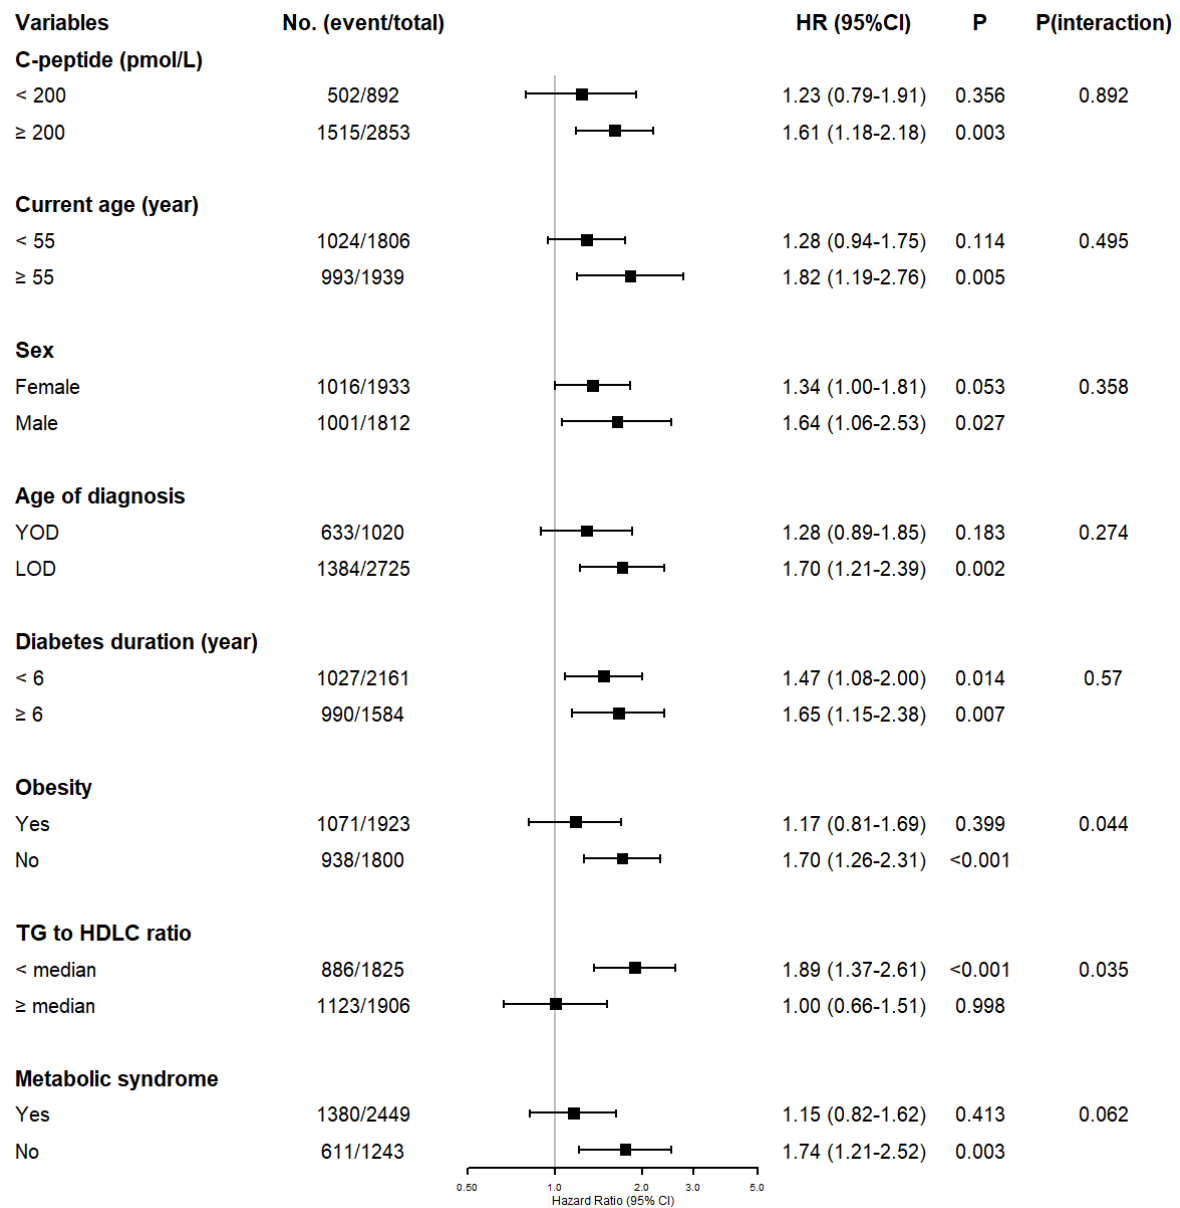

Notes: (1) The reference group in subgroup analysis is patients with GADA-. The HRs of GADA+ for incident insulin therapy were adjusted for age, sex, diabetes duration, year of assessment, HbA1c, BMI, TG to HDLc ratio, eGFR, and baseline treatment of oral glucose lowering drugs.

Figure S5. Subgroup analysis of the associations between C-peptide levels stratified by 200 pmol/L and incident insulin therapy

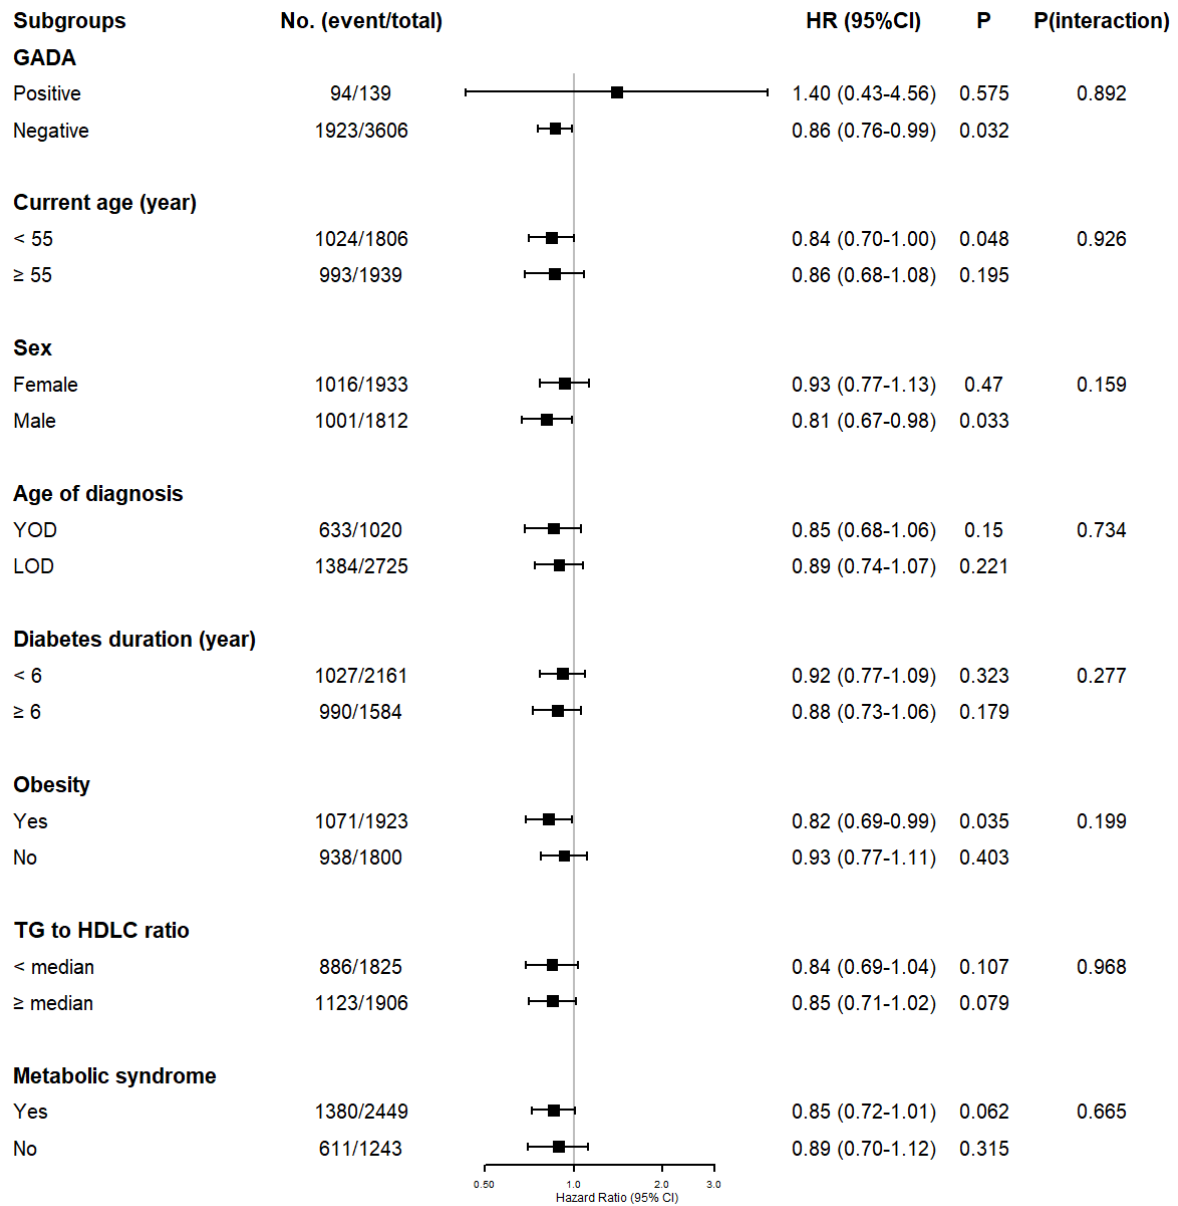

Notes: (1) The reference group in subgroup analysis is patients with high CP (CP  $\geq$  200 pmol/L). The HRs of low CP (CP < 200 pmol/L) for incident insulin therapy were adjusted for age, sex, diabetes duration, year of assessment, HbA1c, BMI, TG to HDLc ratio, eGFR, and baseline treatment of oral glucose lowering drugs.



Figure S6. Subgroup analysis of the associations between GADA positivity and severe hypoglycemia

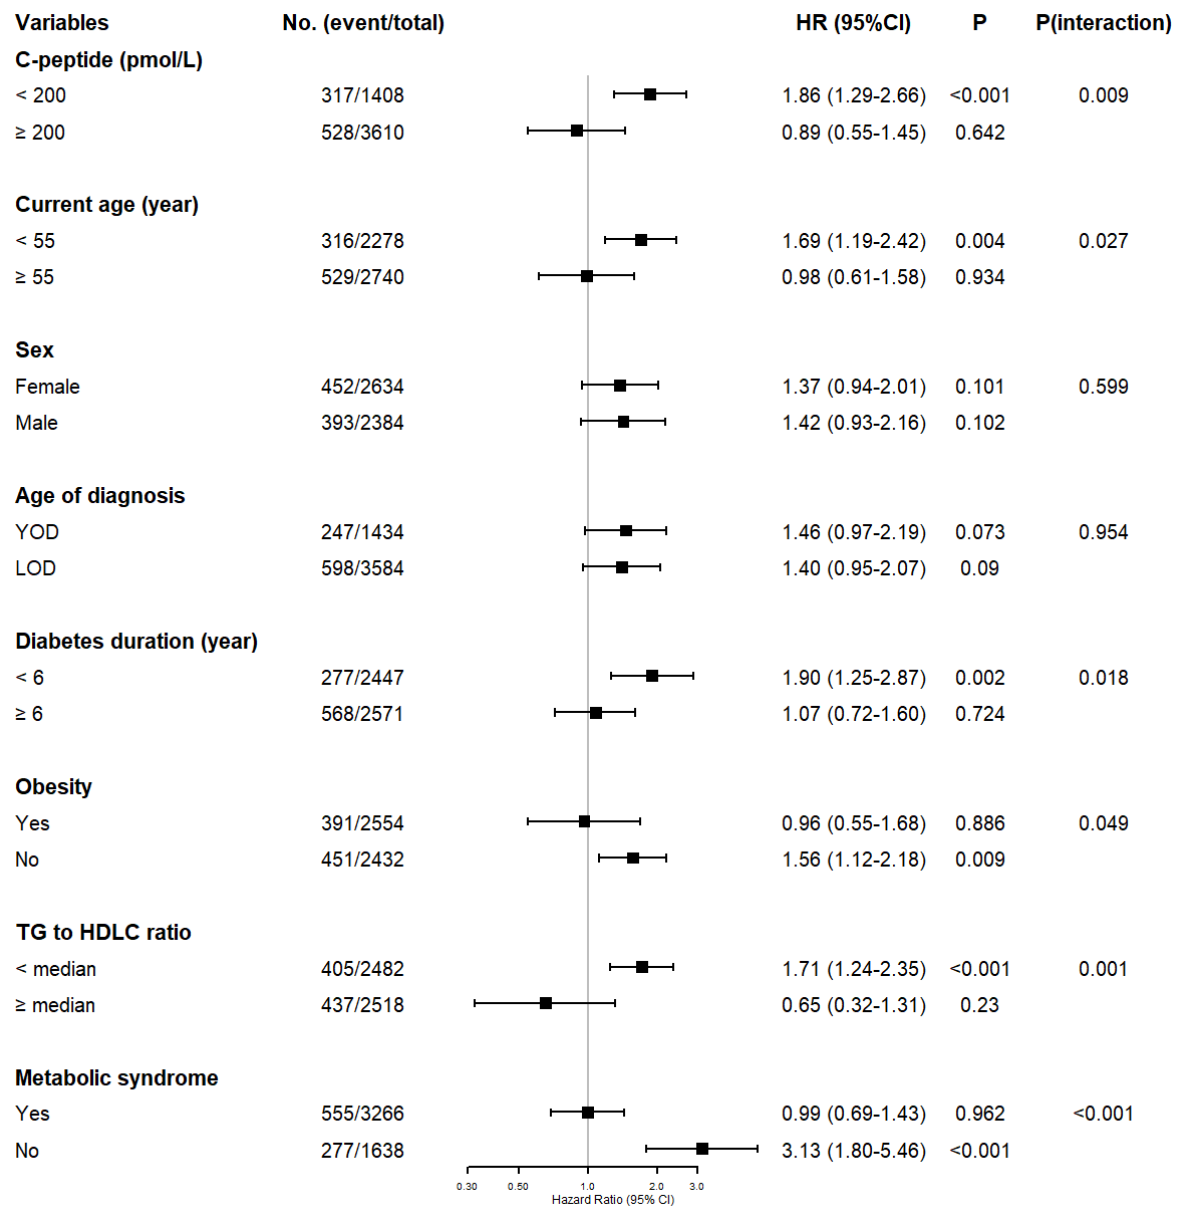

Notes: (1) The reference group in subgroup analysis is patients with GADA-. The HRs of GADA+ for severe hypoglycemia were adjusted for age, sex, diabetes duration, year of assessment, HbA1c, BMI, TG to HDLc ratio, eGFR, baseline history of CVD, and baseline treatment of glucose lowering drugs and insulin.

Figure S7. Subgroup analysis of the associations between C-peptide levels stratified by 200 pmol/L and severe hypoglycemia

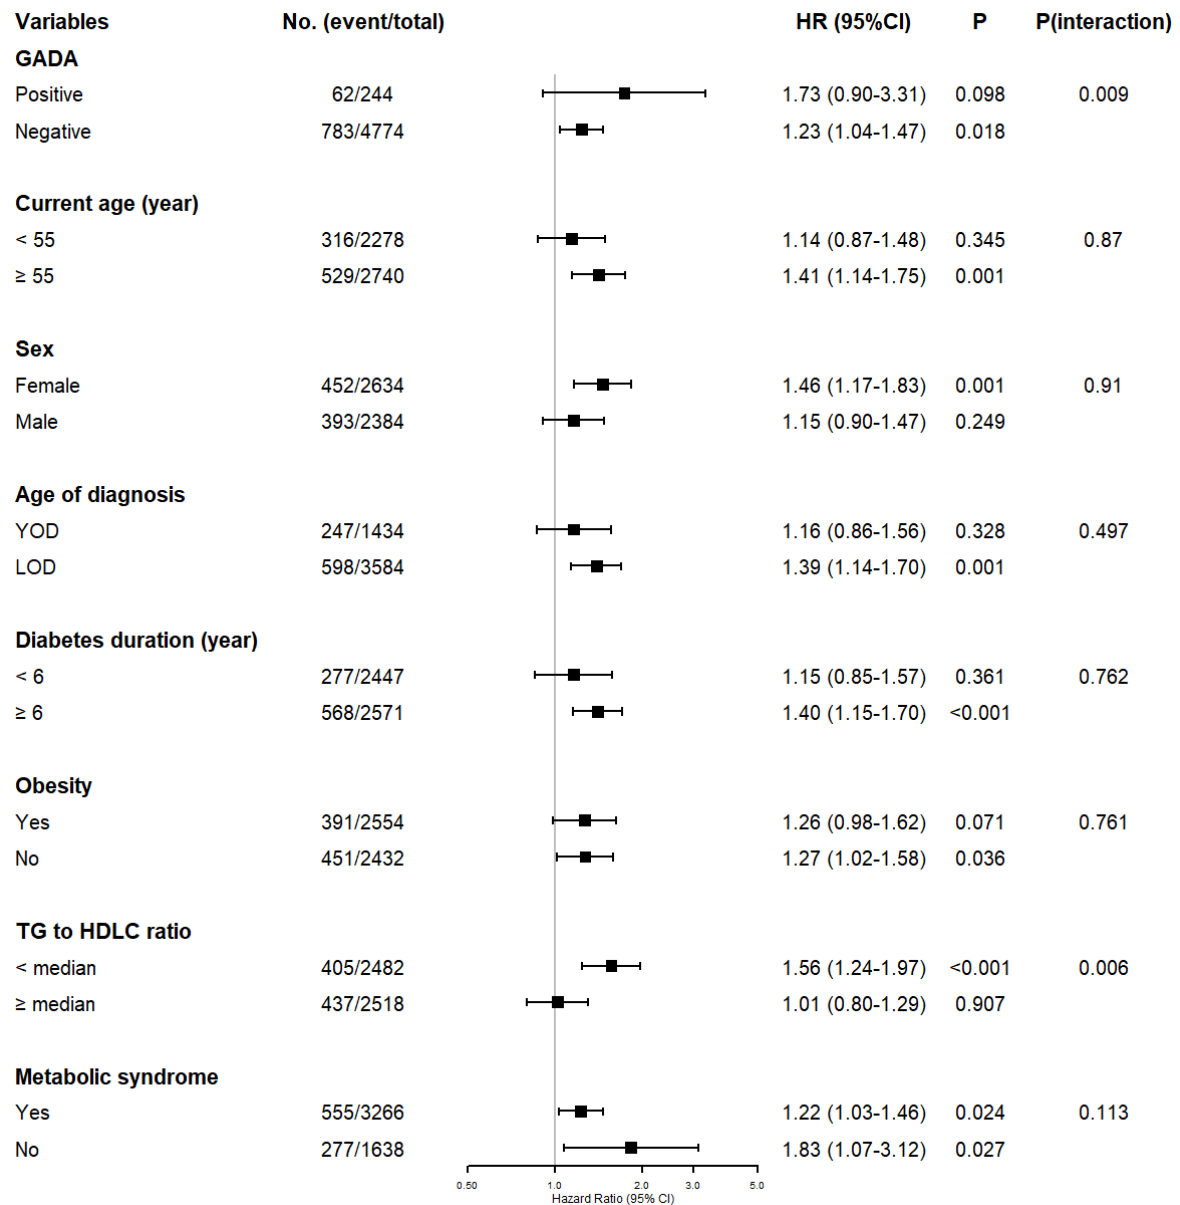

Notes: (1) The reference group in subgroup analysis is patients with high CP ( $CP \geq 200$  pmol/L). The HRs of low CP ( $CP < 200$  pmol/L) for severe hypoglycemia were adjusted for age, sex, diabetes duration, year of assessment, HbA1c, BMI, TG to HDLc ratio, eGFR, baseline history of CVD, and baseline treatment of glucose lowering drugs and insulin.

Figure S8. Mean HbA1c changes from baseline to 6 and 12 months after insulin initiation

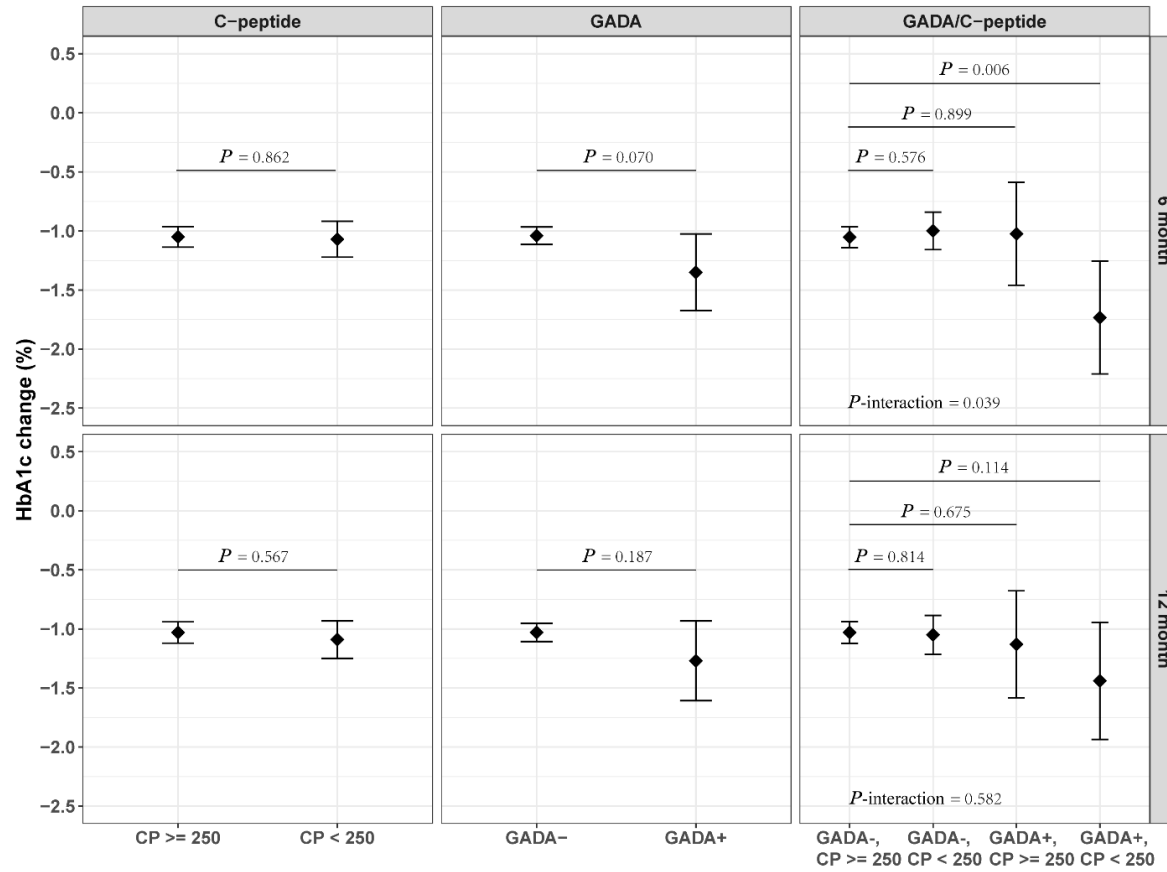

Notes: (1) Mean HbA1c changes at 6 months and 12 months after insulin initiation were adjusted for baseline HbA1c, age, sex, diabetes duration, and year of assessment. (2) The unit for CP is pmol/L. P-values were generated from the linear regression model with adjustments for covariates. The reference group was CP  $\geq$  250 pmol/L, GADA-, GADA- and CP  $\geq$  250 pmol/L, respectively.

Figure S9. Subgroup analysis of the associations between C-peptide levels stratified by 250 pmol/L and incident insulin therapy

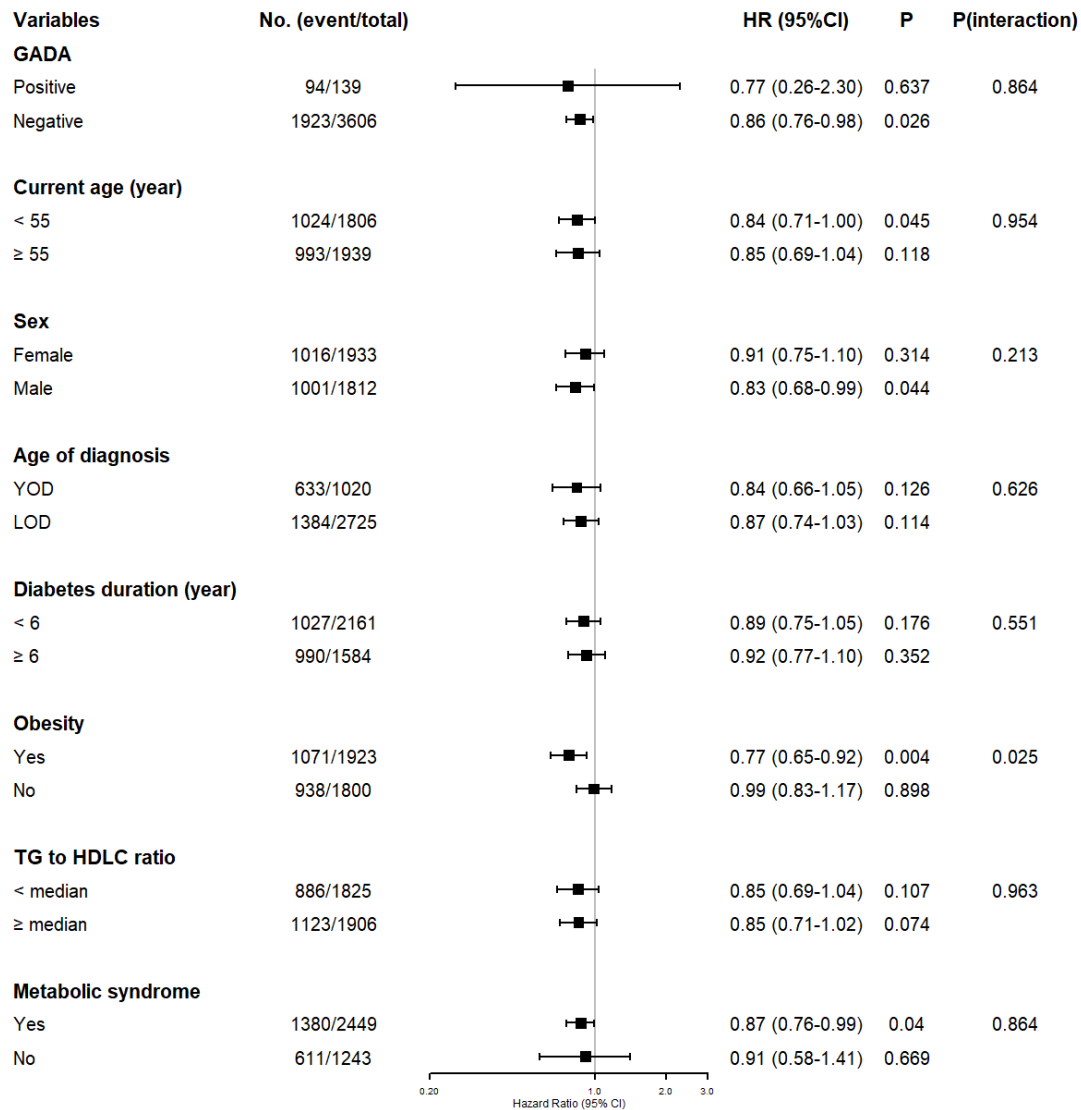

Notes: (1) The reference group in subgroup analysis is patients with high CP ( $CP \geq 250$  pmol/L). The HRs of low CP ( $CP < 250$  pmol/L) for incident insulin therapy were adjusted for age, sex, diabetes duration, year of assessment, HbA1c, BMI, TG to HDLc ratio, eGFR, and baseline treatment of oral glucose lowering drugs.

Figure S10. Subgroup analysis of the associations between C-peptide levels stratified by 250 pmol/L and severe hypoglycemia

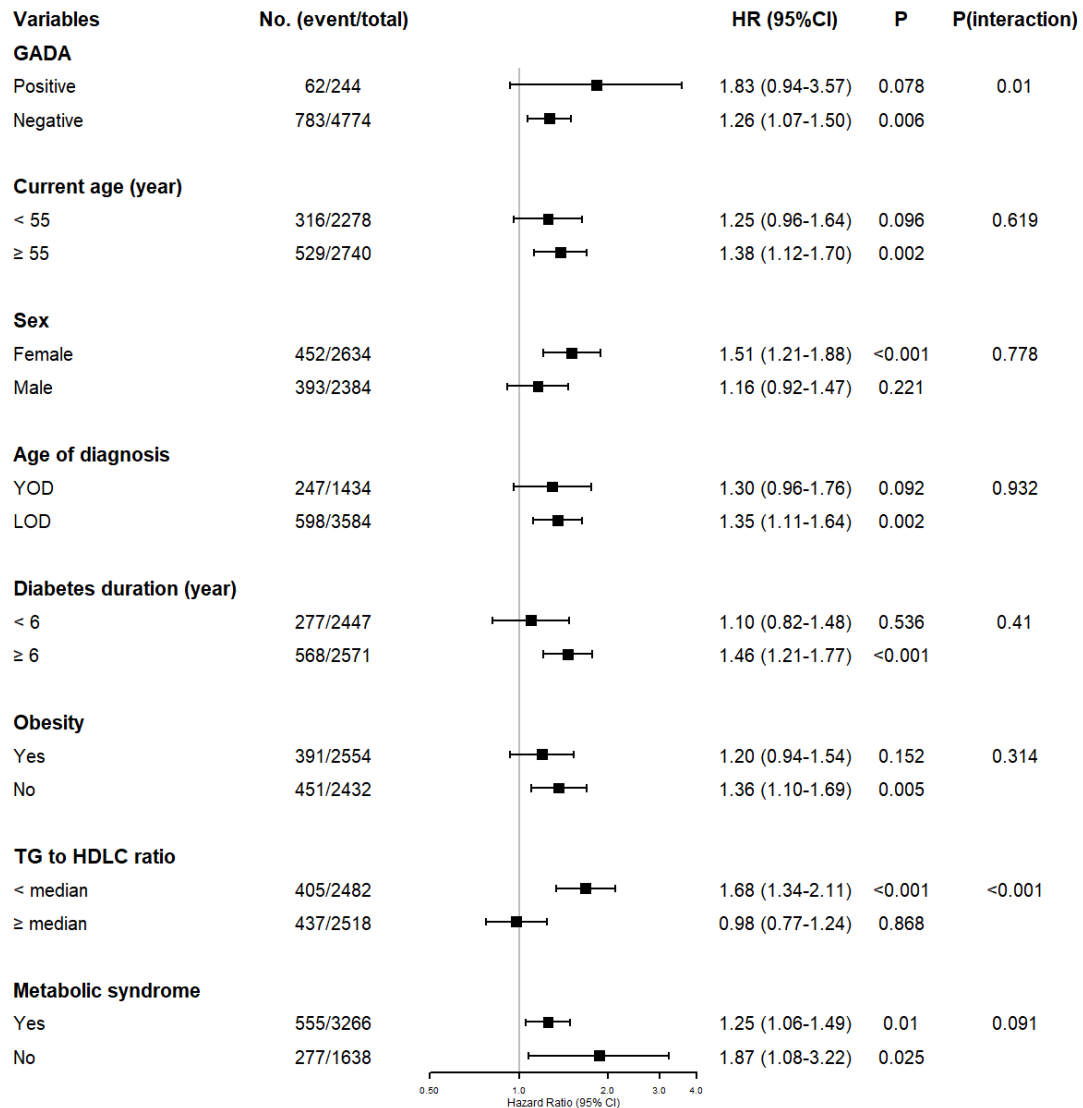

Notes: (1) The reference group in subgroup analysis is patients with high CP ( $CP \geq 250$  pmol/L). The HRs of low CP ( $CP < 250$  pmol/L) for severe hypoglycemia were adjusted for age, sex, diabetes duration, year of assessment, HbA1c, BMI, TG to HDLc ratio, eGFR, baseline history of CVD, and baseline treatment of glucose lowering drugs and insulin.

Figure S11. Mean HbA1c changes from baseline to 6 and 12 months after insulin initiation in patients without advanced CKD at baseline

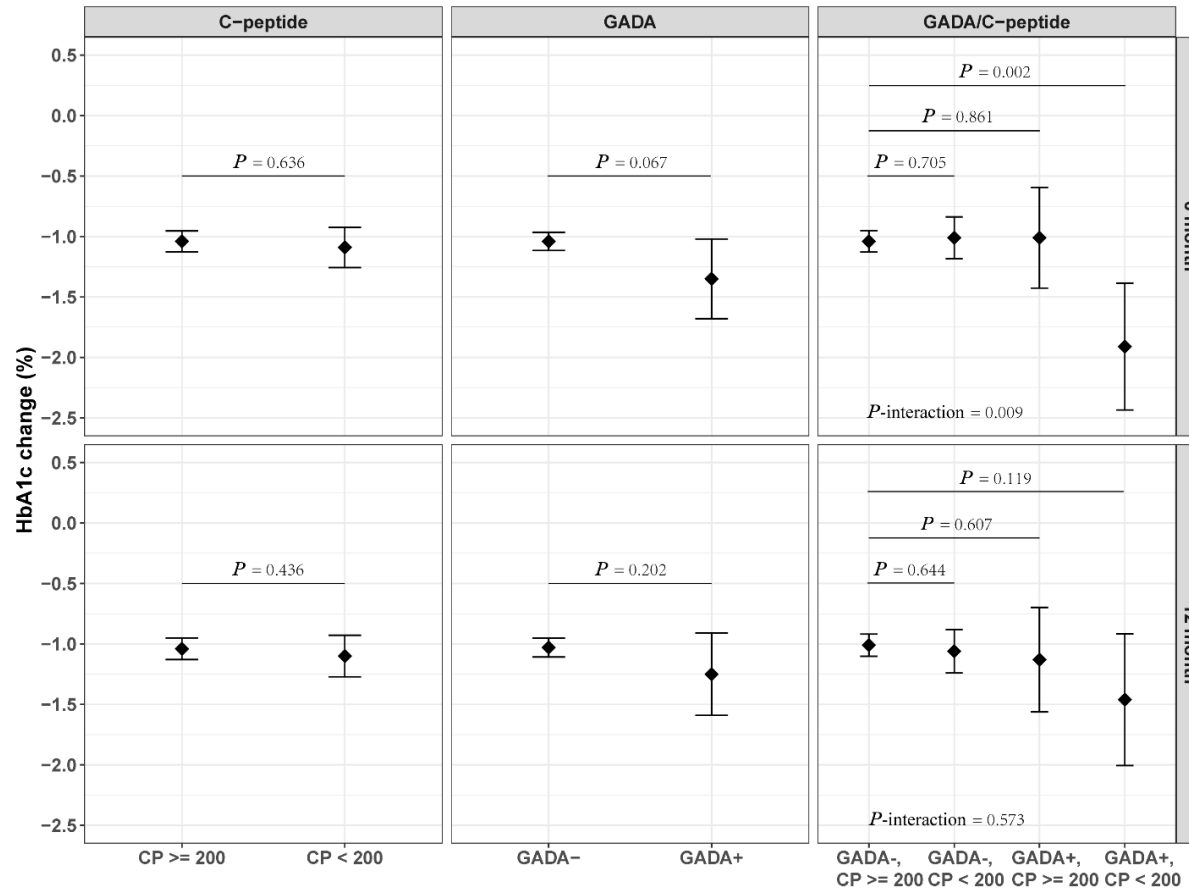

Notes: (1) Mean HbA1c changes at 6 months and 12 months after insulin initiation were adjusted for baseline HbA1c, age, sex, diabetes duration, and year of assessment. (2) The unit for CP is pmol/L. P-values were generated from the linear regression model with adjustments for covariates. The reference group was CP  $\geq$  200 pmol/L, GADA-, GADA- and CP  $\geq$  200 pmol/L, respectively.

Figure S12 Mean HbA1c changes from the date of initiation to 6 and 12 months after insulin initiation in patients initiated with basal insulin only regimen

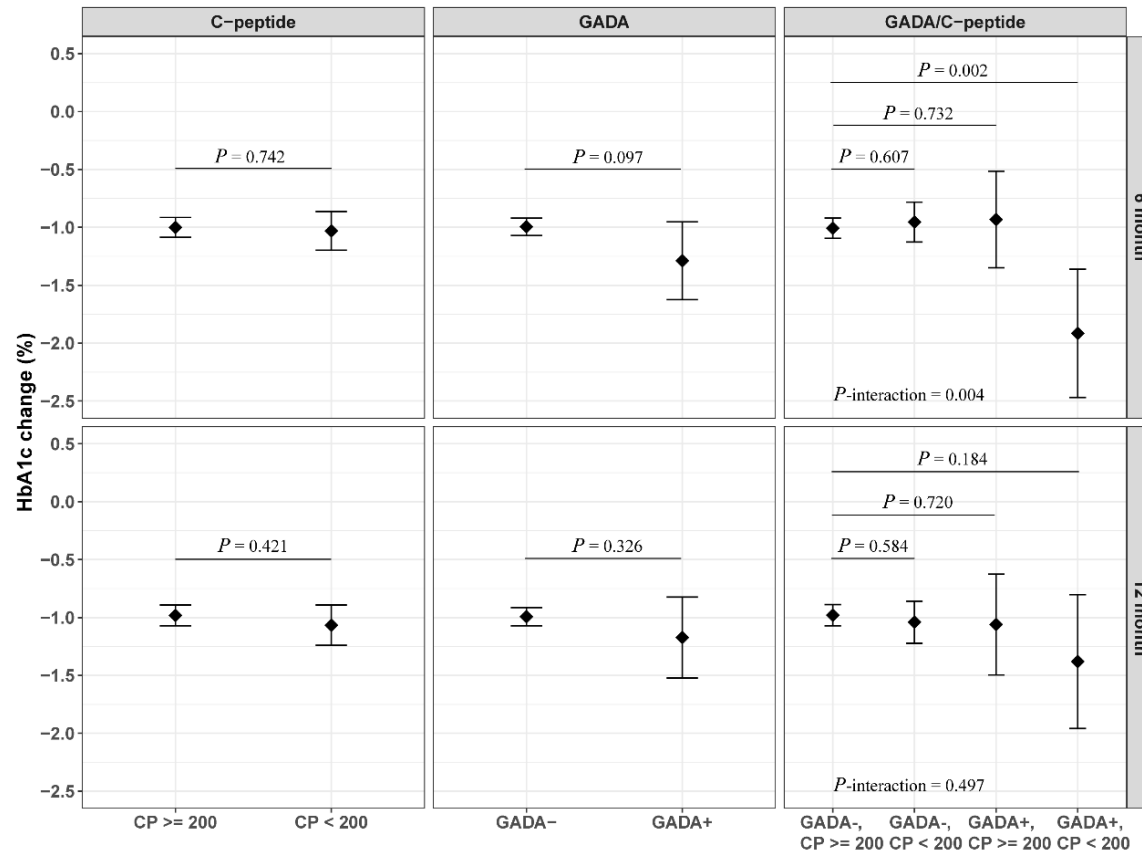

Notes: (1) Mean HbA1c changes at 6 months and 12 months after insulin initiation were adjusted for baseline HbA1c, age, sex, diabetes duration, and year of assessment. (2) The unit for CP is pmol/L. P-values were generated from the linear regression model with adjustments for covariates. The reference group was CP ≥ 200 pmol/L, GADA-, GADA- and CP ≥ 200 pmol/L, respectively.

Table S1. Baseline characteristics of patients with and without CP or GADA measurements

|                                                      | With measurement | Without measurement | P      |
|------------------------------------------------------|------------------|---------------------|--------|
| Number                                               | 5354             | 4462                |        |
| Age (year)                                           | 56.00 (14.27)    | 58.66 (13.46)       | <0.001 |
| Men, n (%)                                           | 2543 (47.6)      | 2124 (47.6)         | 0.976  |
| Duration of diabetes (year)                          | 6.0 [2.0, 12.0]  | 6.0 [1.0, 11.0]     | <0.001 |
| Age of diagnosis (year)                              | 47.8 (13.8)      | 51.4 (13.0)         | <0.001 |
| Young-onset diabetes, n (%)                          | 1592 (29.8)      | 656 (15.3)          | <0.001 |
| Family history of diabetes, n (%)                    | 2432 (45.5)      | 1624 (36.4)         | <0.001 |
| Smoking, n (%)                                       |                  |                     | 0.020  |
| Current                                              | 666 (12.5)       | 572 (12.9)          |        |
| Ex                                                   | 839 (15.7)       | 783 (17.7)          |        |
| Never                                                | 3828 (71.8)      | 3072 (69.4)         |        |
| Waist circumference (cm)                             |                  |                     | <0.001 |
| Men                                                  | 89.3 (10.3)      | 87.8 (10.0)         |        |
| Women                                                | 83.8 (10.4)      | 83.9 (10.1)         | 0.718  |
| Body mass index (kg/m <sup>2</sup> )                 | 25.5 (4.3)       | 25.0 (4.0)          | <0.001 |
| Fasting plasma glucose (mmol/l)                      | 8.4 (3.2)        | 8.8 (3.4)           | <0.001 |
| HbA1c (%)                                            | 7.6 (1.7)        | 7.7 (1.9)           | 0.004  |
| Systolic blood pressure (mmHg)                       | 132.6 (19.6)     | 137.1 (21.6)        | <0.001 |
| Diastolic blood pressure (mmHg)                      | 73.7 (10.4)      | 76.7 (11.3)         | <0.001 |
| Total cholesterol (mmol/l)                           | 5.0 (1.1)        | 5.3 (1.2)           | <0.001 |
| HDL-cholesterol (mmol/l)                             | 1.4 (0.4)        | 1.3 (0.4)           | <0.001 |
| LDL-cholesterol (mmol/l)                             | 2.8 (0.9)        | 3.2 (1.0)           | <0.001 |
| Triglycerides (mmol/l)                               | 1.4 [1.0, 2.0]   | 1.4 [1.0, 2.1]      | 0.888  |
| Urinary ACR (mg/mmol/L)                              | 1.9 [0.7, 10.1]  | 2.4 [0.9, 13.5]     | <0.001 |
| eGFR (ml/min/1.73 m <sup>2</sup> )                   | 80.3 (26.1)      | 78.9 (25.6)         | 0.008  |
| <b>History of vascular complications at baseline</b> |                  |                     |        |
| Retinopathy, n (%)                                   | 1304 (27.2)      | 1188 (26.6)         | 0.577  |
| Neuropathy, n (%)                                    | 929 (17.4)       | 1130 (25.3)         | <0.001 |
| Albuminuria, n (%)                                   | 2170 (41.4)      | 1945 (45.9)         | <0.001 |
| Chronic kidney disease, n (%)                        | 1161 (21.7)      | 1053 (23.6)         | 0.027  |
| End-stage kidney disease, n (%)                      | 60 (1.1)         | 101 (2.3)           | <0.001 |
| Myocardial infarction, n (%)                         | 136 (2.5)        | 343 (7.7)           | <0.001 |
| Congestive heart failure, n (%)                      | 129 (2.4)        | 117 (2.6)           | 0.550  |
| Coronary heart disease, n (%)                        | 467 (8.7)        | 351 (7.9)           | 0.132  |
| Peripheral vascular disease, n (%)                   | 258 (4.8)        | 319 (7.1)           | <0.001 |
| Stroke, n (%)                                        | 184 (3.4)        | 144 (3.2)           | 0.597  |
| Cardiovascular disease, n (%)                        | 810 (15.1)       | 725 (16.2)          | 0.142  |
| Cancer, n (%)                                        | 220 (4.1)        | 73 (1.6)            | <0.001 |
| <b>Treatment at baseline</b>                         |                  |                     |        |
| Glucose lowering oral drugs, n (%)                   | 3648 (74.6)      | 2756 (61.8)         | <0.001 |
| Insulin, n (%)                                       | 1108 (22.6)      | 787 (17.6)          | <0.001 |
| Lipid lowering drugs, n (%)                          | 1281 (24.0)      | 604 (13.5)          | <0.001 |
| BP lowering drugs, n (%)                             | 2671 (50.1)      | 1954 (43.8)         | <0.001 |
| RAS inhibitors, n (%)                                | 1390 (29.0)      | 827 (18.5)          | <0.001 |

Notes: (1) Data are expressed as mean (SD) or number (%) median [IQR]. (2) Abbreviations: ACR; albumin creatinine ratio; BP, blood pressure; eGFR, estimated glomerular filtration rate; RAS, renin angiotensin system; TG, triglycerides.



Table S2. Baseline characteristics of patients stratified by GADA status

|                                                             | <b>GADA+</b>      | <b>GADA-</b>      | <b>P</b> |
|-------------------------------------------------------------|-------------------|-------------------|----------|
| Number                                                      | 257               | 4973              |          |
| Age (year)                                                  | 50.2 (13.4)       | 56.81 (13.81)     | <0.001   |
| Men, n (%)                                                  | 95 (37.0)         | 2396 (48.2)       | 0.001    |
| Duration of diabetes (year)                                 | 5.0 [2.0, 12.0]   | 6.0 [1.0, 12.0]   | 0.958    |
| Age of diagnosis (year)                                     | 42.3 (12.2)       | 48.7 (13.2)       | <0.001   |
| Young-onset diabetes, n (%)                                 | 127 (49.4)        | 1368 (27.5)       | <0.001   |
| Year of assessment (year)                                   | 2003 [2000, 2006] | 2004 [2001, 2006] | 0.253    |
| Family history of diabetes, n (%)                           | 125 (48.6)        | 2272 (45.7)       | 0.389    |
| Smoking, n (%)                                              |                   |                   | 0.013    |
| Current                                                     | 34 (13.3)         | 623 (12.6)        |          |
| Ex                                                          | 24 (9.4)          | 806 (16.2)        |          |
| Never                                                       | 198 (77.3)        | 3531 (71.2)       |          |
| Alcohol drinking, n (%)                                     |                   |                   | 0.019    |
| Current                                                     | 20 (7.8)          | 561 (11.3)        |          |
| Ex                                                          | 18 (7.1)          | 546 (11.0)        |          |
| Never                                                       | 217 (85.1)        | 3837 (77.6)       |          |
| Waist circumference (cm)                                    |                   |                   |          |
| Men                                                         | 85.2 (11.5)       | 89.7 (10.0)       | <0.001   |
| Women                                                       | 78.9 (11.1)       | 84.4 (10.1)       | <0.001   |
| Body mass index (kg/m <sup>2</sup> )                        | 24.0 (4.8)        | 25.7 (4.2)        | <0.001   |
| Waist-hip-ratio                                             | 0.9 (0.1)         | 0.9 (0.1)         | <0.001   |
| Fasting plasma glucose (mmol/l)                             | 9.3 (4.0)         | 8.3 (3.1)         | <0.001   |
| HbA1c (%)                                                   | 8.3 (2.3)         | 7.6 (1.7)         | <0.001   |
| Systolic blood pressure (mmHg)                              | 125.4 (19.5)      | 133.4 (19.4)      | <0.001   |
| Diastolic blood pressure (mmHg)                             | 72.1 (11.3)       | 73.8 (10.3)       | 0.010    |
| Total cholesterol (mmol/l)                                  | 5.1 (1.2)         | 5.0 (1.0)         | 0.451    |
| HDL-cholesterol (mmol/l)                                    | 1.5 (0.5)         | 1.4 (0.4)         | <0.001   |
| LDL-cholesterol (mmol/l)                                    | 2.9 (0.9)         | 2.8 (0.9)         | 0.645    |
| Triglycerides (mmol/l)                                      | 1.1 [0.7, 1.5]    | 1.4 [1.0, 2.1]    | <0.001   |
| Ratio of TG to HDL-C                                        | 0.8 [0.4, 1.2]    | 1.1 [0.7, 1.8]    | <0.001   |
| C-peptide (pmol/L)                                          | 366.5 (354.5)     | 517.4 (405.5)     | <0.001   |
| Urinary ACR (mg/mmol/L)                                     | 1.5 [0.7, 5.8]    | 2.0 [0.7, 10.8]   | 0.046    |
| eGFR (ml/min/1.73 m <sup>2</sup> )                          | 88.8 (23.1)       | 79.2 (25.9)       | <0.001   |
| <b><i>History of vascular complications at baseline</i></b> |                   |                   |          |
| Severe hypoglycemia, n (%)                                  | 13 (5.1)          | 199 (4.0)         | 0.499    |
| Retinopathy, n (%)                                          | 43 (19.4)         | 1251 (27.7)       | 0.009    |
| Neuropathy, n (%)                                           | 29 (11.4)         | 899 (18.1)        | 0.008    |
| Albuminuria, n (%)                                          | 86 (34.3)         | 2066 (42.4)       | 0.014    |
| Chronic kidney disease, n (%)                               | 27 (10.5)         | 1131 (22.7)       | <0.001   |
| End-stage kidney disease, n (%)                             | 0 (0.0)           | 60 (1.2)          | 0.141    |
| Myocardial infarction, n (%)                                | 7 (2.7)           | 128 (2.6)         | 1.000    |
| Congestive heart failure, n (%)                             | 5 (1.9)           | 123 (2.5)         | 0.744    |
| Coronary heart disease, n (%)                               | 19 (7.4)          | 447 (9.0)         | 0.445    |
| Peripheral vascular disease, n (%)                          | 12 (4.7)          | 242 (4.9)         | 1.000    |
| Stroke, n (%)                                               | 0 (0.0)           | 183 (3.7)         | 0.003    |
| Cardiovascular disease, n (%)                               | 29 (11.3)         | 775 (15.6)        | 0.076    |
| Cancer, n (%)                                               | 6 (2.3)           | 212 (4.3)         | 0.178    |
| <b><i>Treatment at baseline</i></b>                         |                   |                   |          |
| Glucose lowering oral drugs, n (%)                          | 159 (68.8)        | 3480 (75.6)       | 0.026    |
| Insulin, n (%)                                              | 118 (45.9)        | 1367 (27.5)       | <0.001   |
| Lipid lowering drugs, n (%)                                 | 37 (14.5)         | 1240 (25.0)       | <0.001   |
| BP lowering drugs, n (%)                                    | 100 (39.1)        | 2563 (51.6)       | <0.001   |
| RAS inhibitors, n (%)                                       | 65 (29.3)         | 1318 (29.1)       | 1.000    |

Notes: (1) Data are expressed as mean (SD) or number (%) median [IQR]. (2) Abbreviations: ACR; albumin creatinine ratio; BP, blood pressure; eGFR, estimated glomerular filtration rate; RAS, renin angiotensin system; TG, triglycerides.

Table S3. Baseline characteristics of patients stratified by C-peptide of 200 pmol/L

|                                                      | CP < 200 pmol/L   | CP ≥ 200 pmol/L   | P               |
|------------------------------------------------------|-------------------|-------------------|-----------------|
| Number                                               | 1494              | 3736              |                 |
| Age (year)                                           | 51.7 (14.5)       | 58.4 (13.1)       | <0.001          |
| Men, n (%)                                           | 685 (45.9)        | 1806 (48.3)       | 0.110           |
| Duration of diabetes (year)                          | 8.0 [2.0, 15.0]   | 5.0 [1.0, 11.0]   | <0.001          |
| Age of diagnosis (year)                              | 41.9 (12.4)       | 50.9 (12.6)       | <0.001          |
| Young-onset diabetes, n (%)                          | 788 (52.7)        | 707 (18.9)        | <0.001          |
| Year of assessment (year)                            | 2001 [1999, 2005] | 2004 [2002, 2006] | <0.001          |
| Family history of diabetes, n (%)                    | 693 (46.4)        | 1704 (45.6)       | 0.633           |
| Smoking, n (%)                                       |                   |                   | 0.090           |
|                                                      | Current           | 208 (14.0)        | 449 (12.1)      |
|                                                      | Ex                | 220 (14.8)        | 610 (16.4)      |
|                                                      | Never             | 1063 (71.3)       | 2666 (71.6)     |
| Alcohol drinking, n (%)                              | Current           | 164 (11.1)        | 417 (11.2)      |
|                                                      | Ex                | 161 (10.8)        | 403 (10.8)      |
|                                                      | Never             | 1159 (78.1)       | 2895 (77.9)     |
| Waist circumference (cm)                             | Men               | 87.2 (10.9)       | 90.4 (9.7)      |
|                                                      | Women             | 82.6 (11.1)       | 84.7 (9.9)      |
| Body mass index (kg/m <sup>2</sup> )                 |                   | 25.1 (4.6)        | 25.8 (4.1)      |
| Waist-hip-ratio                                      |                   | 0.9 (0.1)         | 0.9 (0.1)       |
| Fasting plasma glucose (mmol/l)                      |                   | 8.4 (3.5)         | 8.4 (3.0)       |
| HbA1c (%)                                            |                   | 7.8 (1.9)         | 7.5 (1.7)       |
| Systolic blood pressure (mmHg)                       |                   | 130.3 (19.6)      | 134.1 (19.3)    |
| Diastolic blood pressure (mmHg)                      |                   | 73.1 (10.4)       | 74.0 (10.4)     |
| Total cholesterol (mmol/l)                           |                   | 5.0 (1.1)         | 5.0 (1.1)       |
| HDL-cholesterol (mmol/l)                             |                   | 1.4 (0.4)         | 1.4 (0.4)       |
| LDL-cholesterol (mmol/l)                             |                   | 2.9 (0.9)         | 2.8 (0.9)       |
| Triglycerides (mmol/l)                               |                   | 1.2 [0.8, 1.8]    | 1.5 [1.0, 2.1]  |
| Ratio of TG to HDL-C                                 |                   | 0.9 [0.6, 1.6]    | 1.1 [0.7, 1.8]  |
| C-peptide (pmol/L)                                   |                   | 111.6 (27.8)      | 669.3 (373.9)   |
| Urinary ACR (mg/mmol/L)                              |                   | 1.9 [0.7, 10.4]   | 2.0 [0.7, 10.4] |
| eGFR (ml/min/1.73 m <sup>2</sup> )                   |                   | 86.2 (26.7)       | 77.1 (25.0)     |
| <b>History of vascular complications at baseline</b> |                   |                   |                 |
| Severe hypoglycemia, n (%)                           | 86 (5.8)          | 126 (3.4)         | <0.001          |
| Retinopathy, n (%)                                   | 374 (28.4)        | 920 (26.8)        | 0.294           |
| Neuropathy, n (%)                                    | 289 (19.5)        | 639 (17.1)        | 0.049           |
| Albuminuria, n (%)                                   | 583 (40.3)        | 1569 (42.6)       | 0.150           |
| Chronic kidney disease, n (%)                        | 256 (17.1)        | 902 (24.1)        | <0.001          |
| End-stage kidney disease, n (%)                      | 17 (1.1)          | 43 (1.2)          | 1.000           |
| Myocardial infarction, n (%)                         | 34 (2.3)          | 101 (2.7)         | 0.433           |
| Congestive heart failure, n (%)                      | 28 (1.9)          | 100 (2.7)         | 0.110           |
| Coronary heart disease, n (%)                        | 103 (6.9)         | 363 (9.7)         | 0.001           |
| Peripheral vascular disease, n (%)                   | 84 (5.6)          | 170 (4.6)         | 0.119           |
| Stroke, n (%)                                        | 40 (2.7)          | 143 (3.8)         | 0.050           |
| Cardiovascular disease, n (%)                        | 190 (12.7)        | 614 (16.4)        | 0.001           |
| Cancer, n (%)                                        | 48 (3.2)          | 170 (4.6)         | 0.035           |
| <b>Treatment at baseline</b>                         |                   |                   |                 |
| Glucose lowering oral drugs, n (%)                   | 896 (64.9)        | 2743 (79.4)       | <0.001          |
| Insulin, n (%)                                       | 602 (40.3)        | 883 (23.6)        | <0.001          |
| Lipid lowering drugs, n (%)                          | 283 (19.0)        | 994 (26.6)        | <0.001          |
| BP lowering drugs, n (%)                             | 593 (39.9)        | 2070 (55.5)       | <0.001          |
| RAS inhibitors, n (%)                                | 343 (26.0)        | 1040 (30.3)       | 0.004           |

Notes: (1) Data are expressed as mean (SD) or number (%) median [IQR]. (2) Abbreviations: ACR; albumin creatinine ratio; BP, blood pressure; eGFR, estimated glomerular filtration rate; RAS, renin angiotensin system; TG, triglycerides.

Table S4. Baseline characteristics of patients stratified by C-peptide of 250 pmol/L

|                                                      | CP < 250 pmol/L   | CP ≥ 250 pmol/L   | P               |
|------------------------------------------------------|-------------------|-------------------|-----------------|
| Number                                               | 1494              | 3736              |                 |
| Age (year)                                           | 51.7 (14.5)       | 58.4 (13.1)       | <0.001          |
| Men, n (%)                                           | 685 (45.9)        | 1806 (48.3)       | 0.110           |
| Duration of diabetes (year)                          | 8.0 [2.0, 15.0]   | 5.0 [1.0, 11.0]   | <0.001          |
| Age of diagnosis (year)                              | 41.94 (12.42)     | 50.92 (12.58)     | <0.001          |
| Young-onset diabetes, n (%)                          | 788 (52.7)        | 707 (18.9)        | <0.001          |
| Year of assessment (year)                            | 2001 [1999, 2005] | 2004 [2002, 2006] | <0.001          |
| Family history of diabetes, n (%)                    | 693 (46.4)        | 1704 (45.6)       | 0.633           |
| Smoking, n (%)                                       |                   |                   | 0.090           |
|                                                      | Current           | 208 (14.0)        | 449 (12.1)      |
|                                                      | Ex                | 220 (14.8)        | 610 (16.4)      |
|                                                      | Never             | 1063 (71.3)       | 2666 (71.6)     |
| Alcohol drinking, n (%)                              | Current           | 164 (11.1)        | 417 (11.2)      |
|                                                      | Ex                | 161 (10.8)        | 403 (10.8)      |
|                                                      | Never             | 1159 (78.1)       | 2895 (77.9)     |
| Waist circumference (cm)                             | Men               | 87.2 (10.9)       | 90.4 (9.7)      |
|                                                      | Women             | 82.6 (11.1)       | 84.7 (9.9)      |
| Body mass index (kg/m <sup>2</sup> )                 |                   | 25.1 (4.6)        | 25.8 (4.1)      |
| Waist-hip-ratio                                      |                   | 0.9 (0.1)         | 0.9 (0.1)       |
| Fasting plasma glucose (mmol/l)                      |                   | 8.4 (3.5)         | 8.4 (3.0)       |
| HbA1c (%)                                            |                   | 7.8 (1.9)         | 7.5 (1.7)       |
| Systolic blood pressure (mmHg)                       |                   | 130.3 (19.6)      | 134.1 (19.3)    |
| Diastolic blood pressure (mmHg)                      |                   | 73.1 (10.4)       | 74.0 (10.4)     |
| Total cholesterol (mmol/l)                           |                   | 5.0 (1.1)         | 5.0 (1.1)       |
| HDL-cholesterol (mmol/l)                             |                   | 1.4 (0.4)         | 1.4 (0.4)       |
| LDL-cholesterol (mmol/l)                             |                   | 2.9 (0.9)         | 2.8 (0.9)       |
| Triglycerides (mmol/l)                               |                   | 1.2 [0.8, 1.8]    | 1.5 [1.0, 2.1]  |
| Ratio of TG to HDL-C                                 |                   | 0.9 [0.6, 1.6]    | 1.1 [0.7, 1.8]  |
| C-peptide (pmol/L)                                   |                   | 111.6 (27.8)      | 669.3 (373.9)   |
| Urinary ACR (mg/mmol/L)                              |                   | 1.9 [0.7, 10.4]   | 2.0 [0.7, 10.4] |
| eGFR (ml/min/1.73 m <sup>2</sup> )                   |                   | 86.2 (26.7)       | 77.1 (25.0)     |
| <b>History of vascular complications at baseline</b> |                   |                   |                 |
| Severe hypoglycemia, n (%)                           | 86 (5.8)          | 126 (3.4)         | <0.001          |
| Retinopathy, n (%)                                   | 374 (28.4)        | 920 (26.8)        | 0.294           |
| Neuropathy, n (%)                                    | 289 (19.5)        | 639 (17.1)        | 0.049           |
| Albuminuria, n (%)                                   | 583 (40.3)        | 1569 (42.6)       | 0.150           |
| Chronic kidney disease, n (%)                        | 256 (17.1)        | 902 (24.1)        | <0.001          |
| End-stage kidney disease, n (%)                      | 17 (1.1)          | 43 (1.2)          | 1.000           |
| Myocardial infarction, n (%)                         | 34 (2.3)          | 101 (2.7)         | 0.433           |
| Congestive heart failure, n (%)                      | 28 (1.9)          | 100 (2.7)         | 0.110           |
| Coronary heart disease, n (%)                        | 103 (6.9)         | 363 (9.7)         | 0.001           |
| Peripheral vascular disease, n (%)                   | 84 (5.6)          | 170 (4.6)         | 0.119           |
| Stroke, n (%)                                        | 40 (2.7)          | 143 (3.8)         | 0.050           |
| Cardiovascular disease, n (%)                        | 190 (12.7)        | 614 (16.4)        | 0.001           |
| Cancer, n (%)                                        | 48 (3.2)          | 170 (4.6)         | 0.035           |
| <b>Treatment at baseline</b>                         |                   |                   |                 |
| Glucose lowering oral drugs, n (%)                   | 896 (64.9)        | 2743 (79.4)       | <0.001          |
| Insulin, n (%)                                       | 602 (40.3)        | 883 (23.6)        | <0.001          |
| Lipid lowering drugs, n (%)                          | 283 (19.0)        | 994 (26.6)        | <0.001          |
| BP lowering drugs, n (%)                             | 593 (39.9)        | 2070 (55.5)       | <0.001          |
| RAS inhibitors, n (%)                                | 343 (26.0)        | 1040 (30.3)       | 0.004           |

Notes: (1) Data are expressed as mean (SD) or number (%) median [IQR]. (2) Abbreviations: ACR; albumin creatinine ratio; BP, blood pressure; eGFR, estimated glomerular filtration rate; RAS, renin angiotensin system; TG, triglycerides.

Table S5. Baseline characteristics of patients stratified by C-peptide level of 250 pmol/L and GADA positivity

|                                      |         | Completeness (%) | GADA+             |                   | GADA-             |                   | P*     | P#     | P      |
|--------------------------------------|---------|------------------|-------------------|-------------------|-------------------|-------------------|--------|--------|--------|
|                                      |         |                  | CP < 250 pmol/L   | CP ≥ 250 pmol/L   | CP < 250 pmol/L   | CP ≥ 250 pmol/L   |        |        |        |
| Number                               |         |                  | 131               | 126               | 1584              | 3389              |        |        |        |
| Age (year)                           |         | 100              | 47.5 (12.6)       | 53.0 (13.6)       | 52.8 (14.5)       | 58.7 (13.1)       | 0.001  | <0.001 | <0.001 |
| Men, n (%)                           |         | 100              | 51 (38.9)         | 44 (34.9)         | 752 (47.5)        | 1644 (48.5)       | 0.592  | 0.516  | 0.004  |
| Duration of diabetes (year)          |         | 100              | 6.0 [2.0, 12.0]   | 5.0 [2.0, 12.0]   | 8.0 [2.0, 15.0]   | 5.0 [1.0, 11.0]   | 0.551  | <0.001 | <0.001 |
| Age of diagnosis (year)              |         | 100              | 39.3 (11.5)       | 45.5 (12.2)       | 42.9 (12.6)       | 51.4 (12.5)       | <0.001 | <0.001 | <0.001 |
| Young-onset diabetes, n (%)          |         | 100              | 79 (60.3)         | 48 (38.1)         | 771 (48.7)        | 597 (17.6)        | 0.001  | <0.001 | <0.001 |
| Year of assessment (year)            |         | 100              | 2001 [2000, 2005] | 2004 [2001, 2006] | 2001 [1999, 2005] | 2004 [2002, 2006] | <0.001 | <0.001 | <0.001 |
| Family history of diabetes, n (%)    |         | 100              | 79 (60.3)         | 48 (38.1)         | 771 (48.7)        | 597 (17.6)        | 0.761  | 0.470  | <0.001 |
| Smoking, n (%)                       | Current | 99.73            | 16 (12.3)         | 18 (14.3)         | 224 (14.2)        | 399 (11.8)        | 0.459  | 0.047  | 0.015  |
|                                      | Ex      |                  | 15 (11.5)         | 9 (7.1)           | 243 (15.4)        | 563 (16.7)        |        |        |        |
|                                      | Never   |                  | 99 (76.2)         | 99 (78.6)         | 1112 (70.4)       | 2419 (71.5)       |        |        |        |
| Alcohol drinking, n (%)              | Current | 99.41            | 10 (7.8)          | 10 (7.9)          | 184 (11.7)        | 377 (11.2)        | 0.651  | 0.846  | 0.180  |
|                                      | Ex      |                  | 11 (8.5)          | 7 (5.6)           | 175 (11.1)        | 371 (11.0)        |        |        |        |
|                                      | Never   |                  | 108 (83.7)        | 109 (86.5)        | 1213 (77.2)       | 2624 (77.8)       |        |        |        |
| Waist circumference (cm)             | Men     |                  | 81.0 (10.7)       | 90.1 (10.5)       | 87.6 (10.8)       | 90.7 (9.5)        | <0.001 | <0.001 | <0.001 |
|                                      | Women   |                  | 75.1 (10.3)       | 82.6 (10.6)       | 83.3 (11.0)       | 84.9 (9.7)        | <0.001 | <0.001 | <0.001 |
| Body mass index (kg/m <sup>2</sup> ) |         | 99.29            | 22.6 (4.4)        | 25.5 (4.8)        | 25.2 (4.5)        | 25.9 (4.0)        | <0.001 | <0.001 | <0.001 |
| Waist-hip-ratio                      |         | 99.37            | 0.8 (0.1)         | 0.9 (0.1)         | 0.9 (0.1)         | 0.9 (0.1)         | <0.001 | <0.001 | <0.001 |
| Fasting plasma glucose (mmol/l)      |         | 99.85            | 9.9 (4.6)         | 8.7 (3.2)         | 8.3 (3.3)         | 8.4 (3.0)         | 0.018  | 0.175  | <0.001 |
| HbA1c (%)                            |         | 99.62            | 8.8 (2.6)         | 7.8 (1.7)         | 7.7 (1.8)         | 7.5 (1.7)         | <0.001 | <0.001 | <0.001 |
| Systolic blood pressure (mmHg)       |         | 99.92            | 121.5 (19.3)      | 129.5 (19.0)      | 131.2 (19.6)      | 134.4 (19.2)      | 0.001  | <0.001 | <0.001 |
| Diastolic blood pressure (mmHg)      |         | 99.90            | 70.0 (11.0)       | 74.3 (11.3)       | 73.3 (10.3)       | 74.1 (10.3)       | 0.002  | 0.007  | <0.001 |
| Total cholesterol (mmol/l)           |         | 98.41            | 5.2 (1.2)         | 4.9 (1.1)         | 5.0 (1.0)         | 5.0 (1.1)         | 0.021  | 0.630  | 0.067  |
| HDL-cholesterol (mmol/l)             |         | 99.66            | 1.7 (0.6)         | 1.4 (0.4)         | 1.4 (0.4)         | 1.3 (0.4)         | <0.001 | 0.125  | <0.001 |
| LDL-cholesterol (mmol/l)             |         | 96.62            | 2.9 (1.0)         | 2.8 (0.9)         | 2.9 (0.9)         | 2.8 (0.9)         | 0.256  | 0.053  | 0.149  |
| Triglycerides (mmol/l)               |         | 99.79            | 0.9 [0.6, 1.3]    | 1.2 [0.9, 1.6]    | 1.2 [0.9, 1.8]    | 1.5 [1.1, 2.2]    | <0.001 | <0.001 | <0.001 |
| Ratio of TG to HDL-C                 |         | 99.66            | 0.6 [0.3, 1.0]    | 0.9 [0.6, 1.3]    | 0.9 [0.6, 1.6]    | 1.2 [0.8, 1.9]    | <0.001 | <0.001 | <0.001 |
| C-peptide (pmol/L)                   |         | 79.29            | 117.3 (40.3)      | 625.6 (350.7)     | 127.0 (46.9)      | 699.9 (368.4)     | <0.001 | <0.001 | <0.001 |
| Urinary ACR (mg/mmol/L)              |         | 98.05            | 1.5 [0.7, 4.3]    | 1.6 [0.8, 5.8]    | 1.9 [0.7, 11.2]   | 2.0 [0.7, 10.5]   | 0.503  | 0.995  | 0.233  |

|                                                             |       |             |             |             |             |        |        |        |
|-------------------------------------------------------------|-------|-------------|-------------|-------------|-------------|--------|--------|--------|
| eGFR (ml/min/1.73 m <sup>2</sup> )                          | 99.79 | 91.5 (21.8) | 86.1 (24.2) | 85.1 (27.0) | 76.5 (24.9) | 0.064  | <0.001 | <0.001 |
| <b><i>History of vascular complications at baseline</i></b> |       |             |             |             |             |        |        |        |
| Severe hypoglycemia, n (%)                                  | 100   | 8 (6.1)     | 5 (4.0)     | 93 (5.9)    | 106 (3.1)   | 0.619  | <0.001 | <0.001 |
| Retinopathy, n (%)                                          | 90.75 | 22 (20.6)   | 21 (18.3)   | 423 (30.2)  | 828 (26.5)  | 0.792  | 0.010  | 0.003  |
| Neuropathy, n (%)                                           | 99.60 | 18 (14.0)   | 11 (8.7)    | 309 (19.6)  | 590 (17.5)  | 0.264  | 0.068  | 0.006  |
| Albuminuria, n (%)                                          | 98.05 | 38 (29.9)   | 48 (38.7)   | 634 (41.4)  | 1432 (42.8) | 0.182  | 0.380  | 0.026  |
| Chronic kidney disease, n (%)                               | 100   | 13 (9.9)    | 14 (11.1)   | 290 (18.3)  | 841 (24.8)  | 0.915  | <0.001 | <0.001 |
| End-stage kidney disease, n (%)                             | 100   | 0 (0.0)     | 0 (0.0)     | 19 (1.2)    | 41 (1.2)    | -      | 1.000  | 0.371  |
| Myocardial infarction, n (%)                                | 100   | 1 (0.8)     | 6 (4.8)     | 36 (2.3)    | 92 (2.7)    | 0.113  | 0.412  | 0.176  |
| Congestive heart failure, n (%)                             | 100   | 4 (3.1)     | 1 (0.8)     | 27 (1.7)    | 96 (2.8)    | 0.390  | 0.022  | 0.060  |
| Coronary heart disease, n (%)                               | 100   | 6 (4.6)     | 13 (10.3)   | 114 (7.2)   | 333 (9.8)   | 0.129  | 0.003  | 0.006  |
| Peripheral vascular disease, n (%)                          | 100   | 8 (6.1)     | 4 (3.2)     | 89 (5.6)    | 153 (4.5)   | 0.413  | 0.106  | 0.255  |
| Stroke, n (%)                                               | 100   | 0 (0.0)     | 0 (0.0)     | 49 (3.1)    | 134 (4.0)   | -      | 0.155  | 0.007  |
| Cardiovascular disease, n (%)                               | 100   | 12 (9.2)    | 17 (13.5)   | 213 (13.4)  | 562 (16.6)  | 0.368  | 0.005  | 0.006  |
| Cancer, n (%)                                               | 100   | 2 (1.5)     | 4 (3.2)     | 60 (3.8)    | 152 (4.5)   | 0.645  | 0.290  | 0.259  |
| <b><i>Treatment at baseline</i></b>                         |       |             |             |             |             |        |        |        |
| Glucose lowering oral drugs, n (%)                          | 92.49 | 70 (60.9)   | 89 (76.7)   | 965 (66.2)  | 2515 (79.9) | 0.014  | <0.001 | <0.001 |
| Insulin, n (%)                                              | 100   | 74 (56.5)   | 44 (34.9)   | 620 (39.1)  | 747 (22.0)  | 0.001  | <0.001 | <0.001 |
| Lipid lowering drugs, n (%)                                 | 99.75 | 11 (8.5)    | 26 (20.6)   | 313 (19.8)  | 927 (27.4)  | 0.010  | <0.001 | <0.001 |
| BP lowering drugs, n (%)                                    | 99.79 | 35 (26.9)   | 65 (51.6)   | 656 (41.5)  | 1907 (56.4) | <0.001 | <0.001 | <0.001 |
| RAS inhibitors, n (%)                                       | 90.75 | 24 (22.4)   | 41 (35.7)   | 371 (26.5)  | 947 (30.3)  | 0.044  | 0.011  | 0.010  |

Notes: (1) Data are expressed as mean (SD) or number (%) median [IQR]. (2) Abbreviations: ACR; albumin creatinine ratio; BP, blood pressure; eGFR, estimated glomerular filtration rate; RAS, renin angiotensin system; TG, triglycerides. (3) *P* value was calculated by ANOVA for comparisons across four groups.

Table S6. Associations with incident insulin use and severe hypoglycemia in patients diagnosed with type 2 diabetes stratified by C-peptide level of 250 pmol/L and GADA status.

|                             | Model 1          |        | Model 2          |        | Model 3          |        | Model 4          |        |
|-----------------------------|------------------|--------|------------------|--------|------------------|--------|------------------|--------|
| <i>Insulin initiation</i>   |                  |        |                  |        |                  |        |                  |        |
|                             | HR               | P      | HR               | P      | HR               | P      | HR               | P      |
| CP<250 vs. CP≥250 (pmol/L)  | 0.94 (0.85-1.04) | 0.220  | 0.82 (0.74-0.92) | <0.001 | 0.88 (0.77-0.99) | 0.041  |                  |        |
| GADA+ vs. GADA-             | 1.61 (1.31-1.98) | <0.001 | 1.63 (1.32-2.02) | <0.001 | 1.46 (1.15-1.84) | 0.002  |                  |        |
|                             |                  |        |                  |        |                  |        |                  |        |
| <i>Severe hypoglycaemia</i> |                  |        |                  |        |                  |        |                  |        |
|                             | HR               | P      | HR               | P      | HR               | P      | HR               | P      |
| CP<250 vs. CP≥250 (pmol/L)  | 1.41 (1.23-1.62) | <0.001 | 1.43 (1.23-1.66) | <0.001 | 1.41 (1.21-1.64) | <0.001 | 1.31 (1.12-1.54) | <0.001 |
| GADA+ vs. GADA-             | 1.55 (1.19-2.00) | <0.001 | 1.80 (1.38-2.33) | <0.001 | 1.57 (1.20-2.05) | <0.001 | 1.38 (1.04-1.83) | 0.024  |

Notes: (1) We excluded patients with history of severe hypoglycemia for analysis of severe hypoglycemia while analysis of insulin initiation excluded patients treated with insulin at baseline; (2) In associations with incident insulin therapy, model 1 was crude model, model 2 was adjusted for age, sex, diabetes duration, and year of assessment, model 3 was adjusted for variables in model 2 and HbA1c, BMI, TG to HDLc ratio, eGFR, and baseline treatment of oral glucose lowering drugs. In associations with severe hypoglycemia, model 1 was crude model, model 2 was adjusted for age, sex, diabetes duration, and year of assessment, model 3 was adjusted for variables in model 2 and HbA1c, BMI, and TG to HDLc ratio, model 4 was adjusted for variables in model 3 and eGFR, baseline history of CVD, baseline treatment of glucose lowering drugs and insulin.

Table S7. Associations with insulin initiation and severe hypoglycemia in patients diagnosed with type 2 diabetes without advanced CKD at baseline stratified by C-peptide level of 200 pmol/L and GADA status.

|                             | Model 1          |        | Model 2          |        | Model 3          |        | Model 4          |       |
|-----------------------------|------------------|--------|------------------|--------|------------------|--------|------------------|-------|
| <i>Insulin initiation</i>   |                  |        |                  |        |                  |        |                  |       |
|                             | HR               | P      | HR               | P      | HR               | P      |                  |       |
| CP<200 vs. CP≥200 (pmol/L)  | 0.94 (0.85-1.04) | 0.207  | 0.81 (0.72-0.91) | <0.001 | 0.88 (0.77-1.00) | 0.054  |                  |       |
| GADA+ vs. GADA-             | 1.60 (1.30-1.97) | <0.001 | 1.61 (1.31-2.00) | <0.001 | 1.42 (1.12-1.81) | 0.004  |                  |       |
|                             |                  |        |                  |        |                  |        |                  |       |
| <i>Severe hypoglycaemia</i> |                  |        |                  |        |                  |        |                  |       |
|                             | HR               | P      | HR               | P      | HR               | P      | HR               | P     |
| CP<200 vs. CP≥200 (pmol/L)  | 1.39 (1.20-1.60) | <0.001 | 1.39 (1.19-1.63) | <0.001 | 1.36 (1.16-1.60) | <0.001 | 1.26 (1.06-1.49) | 0.007 |
| GADA+ vs. GADA-             | 1.55 (1.19-2.01) | 0.001  | 1.78 (1.37-2.33) | <0.001 | 1.56 (1.19-2.05) | 0.001  | 1.39 (1.05-1.85) | 0.023 |

Notes: (1) We excluded patients with history of severe hypoglycemia for analysis of severe hypoglycemia while analysis of insulin initiation excluded patients treated with insulin at baseline; (2) In associations with incident insulin therapy, model 1 was crude model, model 2 was adjusted for age, sex, diabetes duration, and year of assessment, model 3 was adjusted for variables in model 2 and HbA1c, BMI, TG to HDLc ratio, eGFR, and baseline treatment of oral glucose lowering drugs. In associations with severe hypoglycemia, model 1 was crude model, model 2 was adjusted for age, sex, diabetes duration, and year of assessment, model 3 was adjusted for variables in model 2 and HbA1c, BMI, and TG to HDLc ratio, model 4 was adjusted for variables in model 3 and eGFR, baseline history of CVD, baseline treatment of glucose lowering drugs and insulin.

Table S8. Associations with insulin initiation and severe hypoglycemia in patients stratified by CP and GADA status in patients diagnosed with type 2 diabetes with available CP and GADA results after excluding patients with low fasting plasma glucose and/or hypoglycemia at baseline.

|                                               | Model 1          |        | Model 2          |        | Model 3          |        | Model 4          |       |
|-----------------------------------------------|------------------|--------|------------------|--------|------------------|--------|------------------|-------|
| Exclude patients with baseline FBG < 4 mmol/L |                  |        |                  |        |                  |        |                  |       |
| <i>Insulin initiation</i>                     |                  |        |                  |        |                  |        |                  |       |
|                                               | HR               | P      | HR               | P      | HR               | P      | HR               | P     |
| CP<200 vs. CP≥200 (pmol/L)                    | 0.93 (0.84-1.03) | 0.150  | 0.81 (0.72-0.91) | <0.001 | 0.88 (0.77-1.00) | 0.049  |                  |       |
| GADA+ vs. GADA-                               | 1.60 (1.30-1.97) | <0.001 | 1.62 (1.31-2.00) | <0.001 | 1.43 (1.13-1.82) | 0.003  |                  |       |
|                                               |                  |        |                  |        |                  |        |                  |       |
| <i>Severe hypoglycaemia</i>                   |                  |        |                  |        |                  |        |                  |       |
|                                               | HR               | P      | HR               | P      | HR               | P      | HR               | P     |
| CP<200 vs. CP≥200 (pmol/L)                    | 1.33 (1.15-1.54) | <0.001 | 1.39 (1.19-1.63) | <0.001 | 1.36 (1.16-1.59) | <0.001 | 1.29 (1.09-1.52) | 0.003 |
| GADA+ vs. GADA-                               | 1.39 (1.06-1.83) | 0.018  | 1.62 (1.23-2.14) | <0.001 | 1.42 (1.07-1.88) | 0.015  | 1.24 (0.92-1.67) | 0.156 |
|                                               |                  |        |                  |        |                  |        |                  |       |
| Exclude patients with hypoglycemia history    |                  |        |                  |        |                  |        |                  |       |
| <i>Insulin initiation</i>                     |                  |        |                  |        |                  |        |                  |       |
|                                               | HR               | P      | HR               | P      | HR               | P      | HR               | P     |
| CP<200 vs. CP≥200 (pmol/L)                    | 0.93 (0.84-1.03) | 0.144  | 0.80 (0.71-0.90) | <0.001 | 0.87 (0.76-0.99) | 0.034  |                  |       |
| GADA+ vs. GADA-                               | 1.61 (1.31-1.98) | <0.001 | 1.63 (1.32-2.02) | <0.001 | 1.48 (1.17-1.88) | 0.001  |                  |       |

Notes: (1) We excluded patients with history of severe hypoglycemia for analysis of severe hypoglycemia while analysis of insulin initiation excluded patients treated with insulin at baseline; (2) For the associations with incident insulin therapy, model 1 was the crude model, model 2 was adjusted for age, sex, diabetes duration, and year of assessment, model 3 was adjusted for variables in model 2 and HbA1c, BMI, TG to HDLc ratio, eGFR, and baseline treatment of oral glucose lowering drugs. For the associations with severe hypoglycemia, model 1 was the crude model, model 2 was adjusted for age, sex, diabetes duration, and year of assessment, model 3 was adjusted for variables in model 2 and HbA1c, BMI, and TG to HDLc ratio, model 4 was adjusted for variables in model 3 and eGFR, baseline history of CVD, baseline treatment of glucose lowering drugs and insulin.



Table S9. Associations with insulin initiation and insulin requirement in patients stratified by CP and GADA status in patients diagnosed with type 2 diabetes with available data.

|                                   | Model 1          |        | Model 2           |        | Model 3           |        |
|-----------------------------------|------------------|--------|-------------------|--------|-------------------|--------|
| <b><i>Insulin initiation</i></b>  |                  |        |                   |        |                   |        |
|                                   | HR               | P      | HR                | P      | HR                | P      |
| CP<200 vs. CP $\geq$ 200 (pmol/L) | 0.93 (0.84-1.03) | 0.160  | 0.81 (0.72-0.91)  | <0.001 | 0.88 (0.77-1.00)  | 0.051  |
| GADA+ vs. GADA-                   | 1.61 (1.31-1.98) | <0.001 | 1.63 (1.32-2.02)  | <0.001 | 1.46 (1.15-1.84)  | 0.002  |
|                                   |                  |        |                   |        |                   |        |
| <b><i>Insulin requirement</i></b> |                  |        |                   |        |                   |        |
|                                   | HR               | P      | HR                | P      | HR                | P      |
| CP<200 vs. CP $\geq$ 200 (pmol/L) | 1.08 (0.99-1.19) | 0.097  | 0.88 (0.79, 0.98) | 0.016  | 0.93 (0.82, 1.04) | 0.201  |
| CP<250 vs. CP $\geq$ 250 (pmol/L) | 1.08 (0.99-1.18) | 0.082  | 0.89 (0.80, 0.98) | 0.023  | 0.95 (0.85, 1.06) | 0.337  |
| GADA+ vs. GADA-                   | 1.44 (1.18-1.76) | <0.001 | 1.40 (1.14-1.71)  | 0.001  | 1.44 (1.17-1.77)  | <0.001 |

Notes: (1) Model 1 was the crude model, model 2 was adjusted for age, sex, diabetes duration, and year of assessment, model 3 was adjusted for variables in model 2 and HbA1c, BMI, TG to HDLc ratio, eGFR, and baseline treatment with oral glucose lowering drugs.

Table S10. Associations with severe hypoglycemia with adjustment for baseline insulin use with regimens in patients diagnosed with type 2 diabetes stratified by CP and GADA.

|                             | Model 1          |        | Model 2          |        | Model 3          |        | Model 4          |       |
|-----------------------------|------------------|--------|------------------|--------|------------------|--------|------------------|-------|
| <i>Severe hypoglycaemia</i> |                  |        |                  |        |                  |        |                  |       |
|                             | HR               | P      | HR               | P      | HR               | P      | HR               | P     |
| CP<200 vs. CP≥200 (pmol/L)  | 1.30 (1.12-1.50) | <0.001 | 1.39 (1.18-1.63) | <0.001 | 1.37 (1.17-1.61) | <0.001 | 1.29 (1.09-1.53) | 0.003 |
| GADA+ vs. GADA-             | 1.53 (1.17-2.01) | 0.002  | 1.79 (1.36-2.34) | <0.001 | 1.58 (1.19-2.08) | <0.001 | 1.39 (1.04-1.87) | 0.027 |

Notes: (1) Among 5018 patients free of history of severe hypoglycaemia, 1358 were treated with insulin at baseline. Amongst them, 926 (68.2%) were treated with basal insulin only, 82 (6.0%) with basal-bolus insulin regimen, 67 (4.9%) with prandial insulin only or prandial plus premixed insulin, 178 (13.1%) with premixed insulin, 105 (7.7%) without regimen information. (2) Model 1 was crude model, model 2 was adjusted for age, sex, diabetes duration, and year of assessment, model 3 was adjusted for variables in model 2 and HbA1c, BMI, and TG to HDLc ratio, model 4 was adjusted for variables in model 3 and eGFR, baseline history of CVD, baseline treatment of glucose lowering drugs, history of insulin use stratified by regimens.

Table S11. Subgroup analysis of associations of GADA positivity and C-peptide levels with insulin initiation and severe hypoglycemia stratified by the median of glucose:CP ratio.

| Outcomes                           | Subgroup         | Variable                           | HR               | P     | P (interaction) |
|------------------------------------|------------------|------------------------------------|------------------|-------|-----------------|
| <b><i>Insulin initiation</i></b>   |                  |                                    |                  |       |                 |
|                                    | Glucose:CP ratio |                                    |                  |       |                 |
|                                    | Below median     | GADA+ vs. GADA-                    | 1.49 (0.93-2.38) | 0.099 | 0.537           |
|                                    | Above median     | GADA+ vs. GADA-                    | 1.80 (1.20-2.72) | 0.005 |                 |
|                                    |                  |                                    |                  |       |                 |
|                                    | Below median     | Per 1-unit decrease of CP (nmol/L) | 0.73 (0.59-0.90) | 0.003 | 0.326           |
|                                    | Above median     | Per 1-unit decrease of CP (nmol/L) | 0.74 (0.44-1.25) | 0.259 |                 |
|                                    |                  |                                    |                  |       |                 |
| <b><i>Severe hypoglycaemia</i></b> |                  |                                    |                  |       |                 |
|                                    | Glucose:CP ratio |                                    |                  |       |                 |
|                                    | Below median     | GADA+ vs. GADA-                    | 1.14 (0.56-2.32) | 0.720 | 0.750           |
|                                    | Above median     | GADA+ vs. GADA-                    | 0.89 (0.54-1.49) | 0.669 |                 |
|                                    |                  |                                    |                  |       |                 |
|                                    | Below median     | Per 1-unit decrease of CP (nmol/L) | 0.92 (0.63-1.33) | 0.659 | 0.036           |
|                                    | Above median     | Per 1-unit decrease of CP (nmol/L) | 1.37 (0.73-2.56) | 0.333 |                 |

Notes: (1) In associations with incident insulin therapy, the model was adjusted for age, sex, diabetes duration, year of assessment, HbA1c, BMI, TG to HDLc ratio, eGFR, baseline treatment of oral glucose lowering drugs. In associations with severe hypoglycemia, the model was adjusted for age, sex, diabetes duration, year of assessment, HbA1c, BMI, TG to HDLc ratio, eGFR, baseline history of CVD, baseline treatment of glucose lowering drugs and insulin.
